# Unpacking the Allee effect: determining individual-level mechanisms that drive global population dynamics

Nabil T. Fadai<sup>†\*</sup>, Stuart T. Johnston<sup>‡°</sup>, and Matthew J. Simpson<sup>†</sup>

<sup>†</sup>School of Mathematical Sciences, Queensland University of Technology, Brisbane, Queensland 4001, Australia.

\*Corresponding author email address: [nabil.fadai@qut.edu.au](mailto:nabil.fadai@qut.edu.au)

<sup>‡</sup>Systems Biology Laboratory, School of Mathematics and Statistics, and Department of Biomedical Engineering, University of Melbourne, Parkville, Victoria 3010, Australia

<sup>°</sup>ARC Centre of Excellence in Convergent Bio-Nano Science and Technology, Melbourne School of Engineering, University of Melbourne, Parkville, Victoria 3010, Australia

September 18, 2019

## Abstract

We present the first solid theoretical foundation for interpreting the origin of Allee effects by providing the missing link in understanding how local individual-based mechanisms translate to global population dynamics. Allee effects were originally proposed to describe population dynamics that cannot be explained by exponential and logistic growth models. However, standard methods simply calibrate continuum models incorporating Allee effects to match observed global population dynamics, without providing any mechanistic insight. By introducing a stochastic individual-based model, with proliferation, death, and motility rates that depend on local density, we present the first modelling framework that gives rise to a range of global Allee effects. Using data from ecology and cell biology, we unpack individual-level mechanisms implicit in an Allee effect model and provide simulation tools for others to repeat this analysis.

Understanding biological population dynamics provides insight into whether a population will survive or become extinct. Salient features of these population dynamics, such as the growth rate and the maximum population density, can be captured using suitable mathematical modelling frameworks<sup>1–16</sup>. A common approach to model the density of a population,  $C(t)$ , is to describe the *per-capita growth rate*<sup>1;2</sup>. The per-capita growth rate,  $f(C)$ , can be used to specify the temporal evolution of population density as

$$\frac{1}{C} \frac{dC}{dt} = f(C). \quad (1)$$

The most common mathematical descriptions of biological population dynamics are exponential and logistic growth models<sup>1;2</sup>. Exponential growth is the simplest model, whereby  $f(C)$  is a positive constant (Fig. 1a). While the exponential growth model captures observed low-density population dynamics<sup>1;4;8;17</sup>, exponential growth implies that the population will eventually become infinite. The logistic growth model (Fig. 1b) incorporates a linearly decreasing  $f(C)$  and is perhaps the most widely used model of biological and ecological population dynamics<sup>1;4;8;17</sup>. This is because the logistic growth model captures two ubiquitous phenomena: (i) near-exponential growth at low density, and; (ii) a finite maximum density, termed the *carrying capacity*<sup>3–5;7;8;17;18</sup>.

Classical exponential and logistic growth models rely on several key assumptions regarding the underlying biological mechanisms that drive population-level, or *global* dynamics<sup>6;9–13;19</sup>. These assumptions include: all individuals survive at all densities<sup>1;2</sup>, and the intrinsic growth and death rates are independent of density<sup>12</sup>. However, populations have been observed to grow more slowly at low densities than predicted by the classical logistic model<sup>6</sup>, while other populations undergo extinction below a threshold density<sup>7;19</sup>. These observations are inconsistent with logistic and exponential models and modifications have been proposed to explain these observations<sup>3–8</sup>.

The Allee effect (Fig. 1c,d) is a common modification of the logistic model that relaxes the assumption that all members of a population will survive. This model describes situations in biology where the per-capita growth rate is smaller, relative to logistic growth, at low population densities<sup>6;9–13;15;18;19</sup>. The Allee effect is often discussed in the context of ecology and is relevant for describing the extinction of endangered species<sup>11;18;20</sup>, population heterogeneity and structure<sup>21–24</sup>, the impact of invasive species<sup>18;20;21;25–27</sup>, and the reduction of biological fitness<sup>15;18;28</sup>. While the Allee effect was first proposed in the ecology literature, more recent interest in the cell biology literature suggests that there is a growing awareness of the role of the Allee effect in populations of cells, including the eradication of cancer cells<sup>9;29;30</sup>, growth rates of tumour cells<sup>4;8;30–32</sup>, and cell migration and invasion assays<sup>12</sup>. The Allee effect typically takes one of two forms, depending on the behaviour at low densities: (i) the *Strong Allee effect*, describing negative per-capita growth below some critical density threshold (Fig. 1d), resulting in the extinction of the population below this threshold, and; (ii) the *Weak Allee effect*, describing a reduced, but positive, per-capita growth rate at low densities (Fig. 1c).

Previous studies incorporating Allee effects solely examine global information<sup>4–6;8–11;13;15;18;31</sup>. Therefore, it is not obvious *a priori* how global Allee effects arise from local, *individual-based* mechanisms. Alternatively, stochastic mathematical models can explicitly incorporate individual-level mechanisms to describe growing populations<sup>12;33;34</sup>. These kind of individual-based model (IBM) simulation frameworks represent single members of the population as *agents* that, for example, move, proliferate, and die according to certain biologically-motivated stochastic rules.

IBMs are increasingly used to model population dynamics, partly because of technological advances mak-

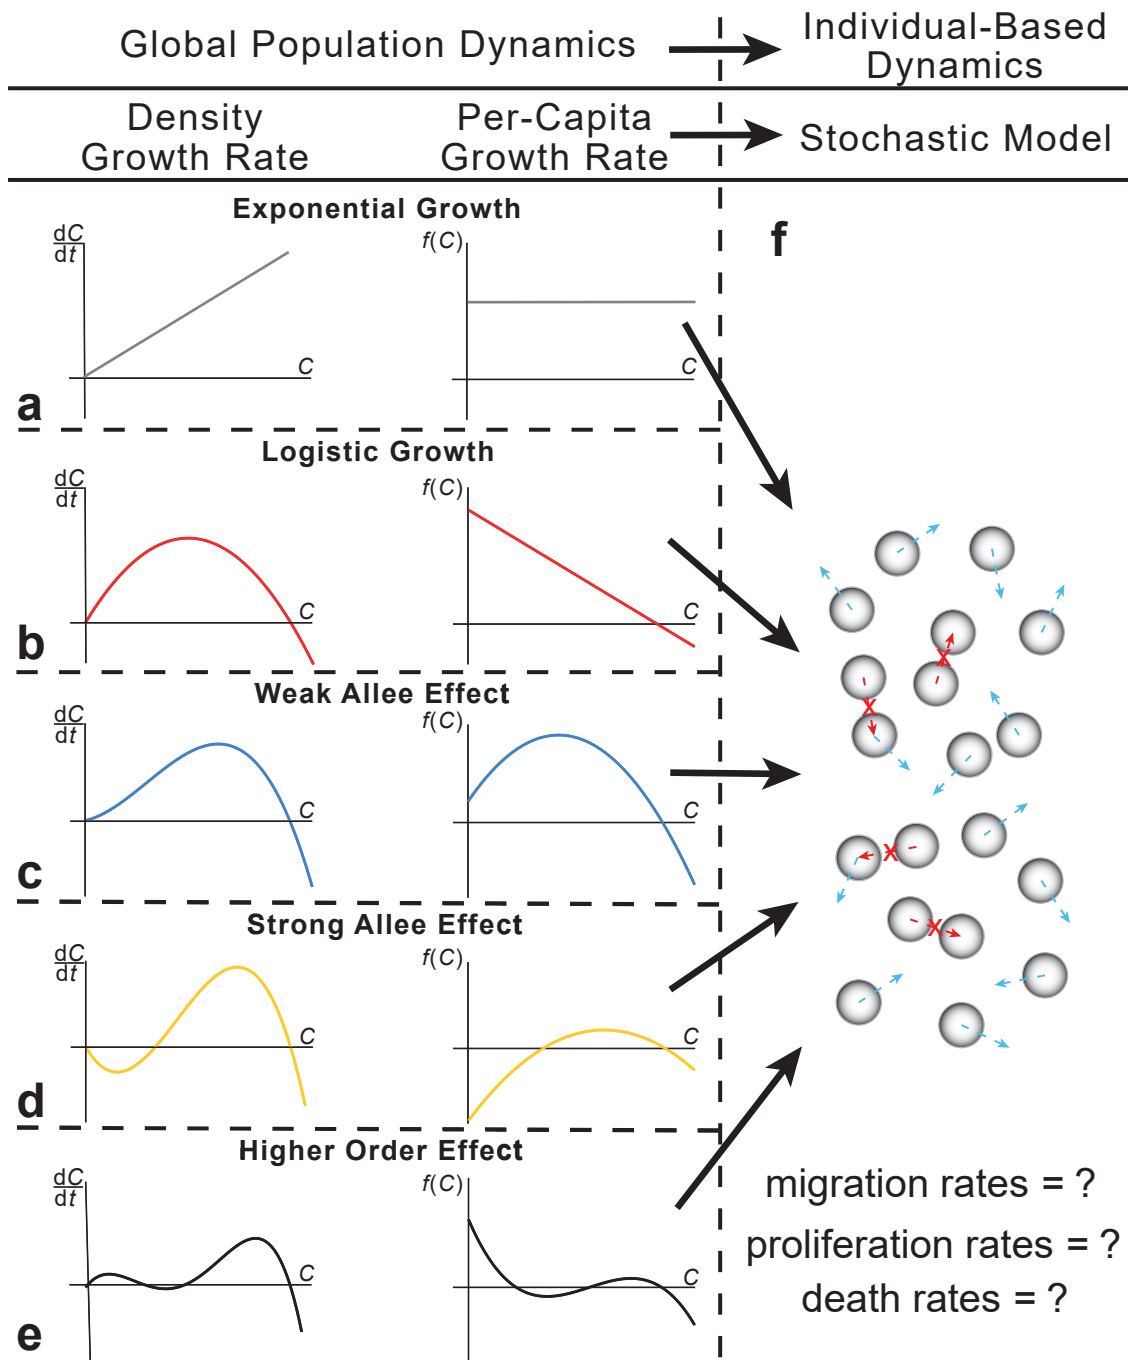

Figure 1: **Relating global population-level models to an individual-based stochastic framework, in order to understand the relationship between global per-capita growth functions and individual-level interactions.** A population can be described using one of two mathematical frameworks. In the first, global population models describe an averaged population density,  $C$ . These global population models are described in terms of the density growth rate,  $dC/dt$ , or the per-capita growth rate,  $f(C) = (1/C)(dC/dt)$ . In the second, a population can also be described using a stochastic individual-based model, where agents move, proliferate, and die based on stochastic rules (blue arrows). To ensure the stochastic model is as realistic as possible, crowding effects are incorporated by not permitting any event that would result in agent overlap (red crosses).

ing it possible to perform high-throughput cell biology experiments and collect large quantities of individual-level data. The task of choosing an appropriate model to capture and interpret experimentally-observed individual behaviour is a significant challenge<sup>35</sup>. Typically, global population models are calibrated to experimental data to provide insight into the global features of the population, such as the carrying capacity or the low-density growth rate<sup>4;7;8;21</sup>. However, this standard approach provides no insight into the underlying individual-level mechanisms. Contrastingly, employing an IBM allows us to describe both the local and global features of a population. The task of designing an IBM to describe *specific* Allee effects, or higher-order effects (Fig. 1e), has never been considered.

In this work, we propose an IBM that incorporates motility, proliferation, and death processes in a population of individuals. This IBM incorporates crowding effects, whereby potential motility and proliferation events can only take place if agents do not overlap (Fig. 1f). By allowing individual-level mechanisms to depend on the density in a small neighbourhood surrounding an agent, the IBM is capable of describing a rich variety of per-capita growth rates. The continuum limit description of the IBM recovers the exact form of many Allee effect models for specific choices of IBM parameters. The main result is to pose and solve an inverse problem that can be described in the following way. Given a particular per-capita growth rate model, such as might be obtained by population-level experimental data, we determine which combinations of individual-level proliferation and death rates give rise to that particular scenario. This work provides the missing link in understanding between local, individual-based mechanisms and particular global outcomes, thereby providing a solid theoretical foundation for understanding and interpreting the mechanisms associated with Allee effects. We conclude by demonstrating how these new tools can be applied in practice by applying our modelling framework and solving the inverse problem to interpret data from both cell biology and ecology experiments. Additionally, interactive MATLAB applets, one of which determines IBM rates and simulations from a user-specified per-capita growth rate, and another that determines IBM rates from a user-specified choice of model fit to experimental data, are available to others to repeat this analysis (Code Availability).

## Results

We consider a population of agents on a two-dimensional hexagonal lattice (Fig. 2). The IBM incorporates agent motility, proliferation, and death, where the individual-level rates vary with local density. All results in the main document consider the local density to be obtained by the six nearest neighbouring lattice sites (Fig. 2); additional results (Supplementary Information) show how our results generalise to larger neighbourhoods. Other types of regular lattices, including square lattices and three-dimensional cubic lattices, can also be used with the IBM framework.

The main objective of this work is to determine how individual-level mechanisms are linked to various global Allee effects, which can be approached in two ways. The first approach is to demonstrate that this IBM framework gives rise to a variety of Allee effects, which we refer to as the *forward problem*, since the *input* of IBM parameters produces a certain global per-capita growth rate. The second approach is to determine which individual-level parameters give rise to a specific global per-capita rate. We refer to this as the *inverse problem*, as the inputs of the IBM parameters are unknown for a particular *output* per-capita rate. To highlight the insights obtained through this approach, we present strategies to link experimental data to various Allee effect models, which we interpret, for the first time, in terms of individual-level mechanisms.

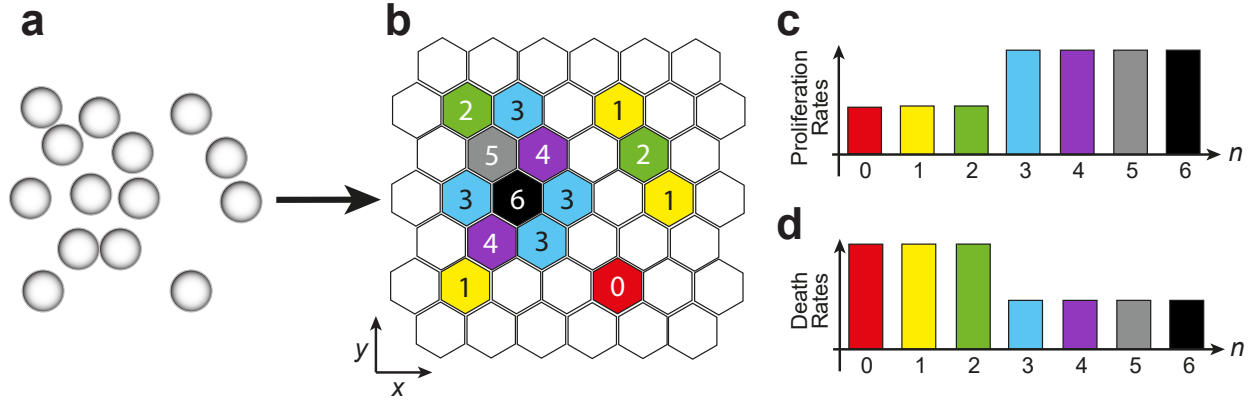

**Figure 2: Agents on a hexagonal lattice with rates of proliferation and death that depend on the local density.** Individuals within a population (a) are represented as agents on a two-dimensional hexagonal lattice (b). The corresponding proliferation and death rates of each agent are dependent on the local density of agents. The simplest measure of local density is the number of nearest neighbouring agents,  $n$ , as shown on the lattice. Here,  $n$  ranges from  $n = 0$  (red hexagon) to  $n = 6$  (black hexagon). These differences in local density are used to specify how the attempted proliferation rates (c) and the death rates (d) depend on  $n$ . For example, in (b), there are three agents that each have one nearest neighbour (yellow hexagons). Each of these agents will have the same attempted proliferation and death rates, whose magnitudes are shown in (c,d) with yellow bars. We note that while an agent with six nearest neighbours (black hexagon) can attempt to proliferate (c, black bar), the net probability of this attempt being successful will always be zero. Nevertheless, an agent with six nearest neighbours can undergo a successful death event (d, black bar).

## The Individual-Based Model (IBM)

We perform non-dimensional simulations where the hexagonal lattice spacing is  $\Delta$ . These simulations can be rescaled to match any particular application by rescaling  $\Delta$ <sup>33;36</sup>. Each lattice site has position

$$(x_i, y_j) = \begin{cases} \left( i\Delta, j\Delta \frac{\sqrt{3}}{2} \right), & j \text{ even,} \\ \left( \left( i + \frac{1}{2} \right) \Delta, j\Delta \frac{\sqrt{3}}{2} \right), & j \text{ odd,} \end{cases} \quad (2)$$

with  $i = 1, \dots, I$ ,  $j = 1, \dots, J$ , and  $\Delta = 1$ .

Crowding effects are important in both cell biology and ecology<sup>12;22;33;34;36–39</sup>, so potential motility and proliferation events that would result in more than one agent per site are aborted. Agents attempt to undergo nearest neighbour motility events at rate  $m_n \geq 0$ , proliferation at rate  $p_n \geq 0$ , and death events at rate  $d_n \geq 0$  (Fig. 2c,d). Here,  $n \in \{0, 1, \dots, 6\}$  is the number of occupied nearest neighbour sites, providing a simple measure of the local density. This is the key feature of the model that gives rise to non-logistic phenomena.

For simplicity, we assume that all agents, regardless of their local density, have the same motility rate ( $m_n \equiv m$ ). Furthermore, we choose  $m$  such that  $p_n/m \ll 1$  and  $d_n/m \ll 1$  for all  $n$ , since the characteristic timescale for migration is much shorter than the characteristic timescale for proliferation and death<sup>40</sup>. Agents are initially seeded on the lattice with a constant probability, representing spatially uniform initial conditions. Furthermore, we impose reflecting boundary conditions<sup>39;41</sup> and, using a Gillespie approach<sup>42</sup>, we simulate the number of agents as a function of time and space (Algorithm 1, Supplementary Information).

To compare data from the IBM with the global population description, we average data from the IBM using

$$\langle C(t) \rangle = \frac{1}{IJL} \sum_{\ell=1}^L Q_{\ell}(t). \quad (3)$$

Here,  $Q_{\ell}(t)$  is the total number of agents on the lattice at time  $t$ , in the  $\ell$ th identically-prepared realisation of the IBM. The total number of identically-prepared realisations is  $L$ ; we choose  $L = 100$  for the results presented in Figs. 3 and 4. A description of the numerical algorithm (Supplementary Information) and a MATLAB implementation of this algorithm are available (Code Availability).

## Continuum limit

While the IBM allows us to visualise realistic-looking individual simulations of population dynamics, as well as to explicitly specify the individual-level behaviour of agents, it is convenient to derive a simpler mathematical description of the average behaviour of the IBM, called the *continuum limit description*<sup>12;14;36</sup>. The continuum limit description gives us the ability to study global, deterministic, features of the IBM when the number of lattice sites is large, as well as to understand how individual-level differences translate into global outcomes.

Since the IBM employs spatially uniform initial conditions, the net flux of agents entering and leaving each lattice site due to migration is, on average, zero<sup>39;41</sup>. Therefore, spatial derivatives in the continuum limit will vanish, meaning that the continuum description of the average agent density,  $C \in [0, 1]$ , is a function of time alone<sup>39;41</sup>. Furthermore, we assume that the occupancy status of lattice sites is independent. This assumption, called the *mean-field approximation*<sup>12;33;36</sup>, is mathematically convenient and is consistent with setting  $m \gg p_n$  and  $m \gg d_n$ <sup>33</sup>. Our results confirm that the mean-field approximation is very accurate.

Using the mean-field approximation, we describe the local density of agents in terms of the average agent density. Specifically, for an agent to have a local density corresponding to  $n$  nearest neighbours, we require: (i) an agent to be present at the particular site; (ii)  $n$  nearest neighbour sites are occupied, and; (iii) the remaining  $(6 - n)$  nearest neighbour sites are vacant. These conditions give the density of agents with  $n$  nearest neighbours,  $I_n \in [0, 1]$ , as

$$I_n = C^{n+1}(1 - C)^{6-n}, \quad n = 0, 1, \dots, 6; \quad (4)$$

hence,  $I_n$  follows a binomial distribution.

To determine how the global agent density evolves, we examine the time rate of change in expected agent density due to proliferation and death events, giving

$$\frac{dC}{dt} = \underbrace{\frac{1}{6} \sum_{i=1}^6 p_{n(i)} I_{n(i)}}_{\text{proliferation events}} - \underbrace{\sum_{j=0}^6 \binom{6}{j} d_j I_j}_{\text{death events}}, \quad (5)$$

where  $n(i)$  is the number of nearest neighbours is each *neighbouring* agent  $i$ . The binomial coefficient,  $\binom{6}{j} = \frac{6!}{j!(6-j)!}$ , accounts for all possible configurations of an agent's  $j$  nearest neighbours. For convenience, we specify the death rate as a proportion of the proliferation rate:  $d_n = \alpha_n p_n$ , where  $\alpha_n \geq 0$ . Equation (5) can also be written in terms of the per-capita growth rate:

$$\frac{1}{C} \frac{dC}{dt} = g(C) = (1 - C) \sum_{n=0}^5 \gamma_n \binom{5}{n} C^n (1 - C)^{5-n} - \gamma_6 C^6, \quad (6)$$

where

$$\gamma_n = \begin{cases} p_n \left(1 - \frac{6\alpha_n}{6-n}\right), & n = 0, \dots, 5, \\ p_6 \alpha_6, & n = 6. \end{cases} \quad (7)$$

A complete description of all steps required to derive equation (6) are given in the Supplementary Information. We deliberately refer to the per-capita growth rate associated with the continuum limit as  $g(C)$ , and the per-capita growth rate prescribed via the global population behaviour as  $f(C)$ . Later, we will show how to choose the IBM parameters such that  $f(C) \equiv g(C)$ . Additionally, we note that equation (6) groups the 14 parameters  $(p_n, \alpha_n)$  as 7 *linearly independent* parameters,  $\gamma_n$ .

### Allee effects arising from the IBM: the forward problem

We now demonstrate that the IBM framework gives rise to a rich variety of Allee effects. In the first instance, we set  $\alpha_n = 0$  for all  $n$ . Equation (7) implies that  $\gamma_n = p_n$  for  $0 \leq n \leq 5$  and  $\gamma_6 = 0$ , such that agents only proliferate and move, and do not die. While this parameter regime is by no means a complete account of all possible parameter combinations, it serves to highlight that  $g(C)$ , from equation (6), can give rise to a suite of Allee effects.

We consider three different choices of  $p_n$ :

$$p_n = \begin{cases} 1.5, & 0 \leq n \leq 5, & \text{(Case 1)} \\ 0.25 + 0.5n, & 0 \leq n \leq 5, & \text{(Case 2)} \\ 0.25 \binom{5}{n}, & 0 \leq n \leq 5. & \text{(Case 3)} \end{cases} \quad (8)$$

We note that in Cases 2 and 3, the range of proliferation rates varies by a factor of 10 as  $n$  varies from zero to five, demonstrating a significant range of proliferation rates within a single IBM realisation. Equation (6) gives,

$$g(C) = \begin{cases} 1.5(1 - C), & \text{(Case 1)} \\ 2.5(1 - C)(0.1 + C), & \text{(Case 2)} \\ 0.25(1 - C)(1 + 20C + 10C^2 - 60C^3 + 30C^4). & \text{(Case 3)} \end{cases} \quad (9)$$

The global population density,  $C$ , can be determined by solving equation (6) with a specified initial condition,  $C(0)$ .

While we can retrieve logistic growth from the continuum limit of the IBM (Case 1; Fig. 3), we can also obtain more complicated, nuanced, per-capita growth rates, including the Weak Allee effect (Case 2; Fig. 3) and completely novel Weak Allee-like per-capita growth rates never previously described (Case 3; Fig. 3). This variety of per-capita rates is particularly noteworthy, as this variety of Allee effects and the connection to a simple biologically-motivated IBM has never been considered previously. This analysis of three simple IBM parameter regimes suffices to show that this IBM framework is related to a large class of global population descriptions. Furthermore, in Fig. 3, as well as videos presented in the Supplementary Information, we show that averaged density data from the IBM,  $\langle C \rangle$ , agrees very well with  $C$ , confirming

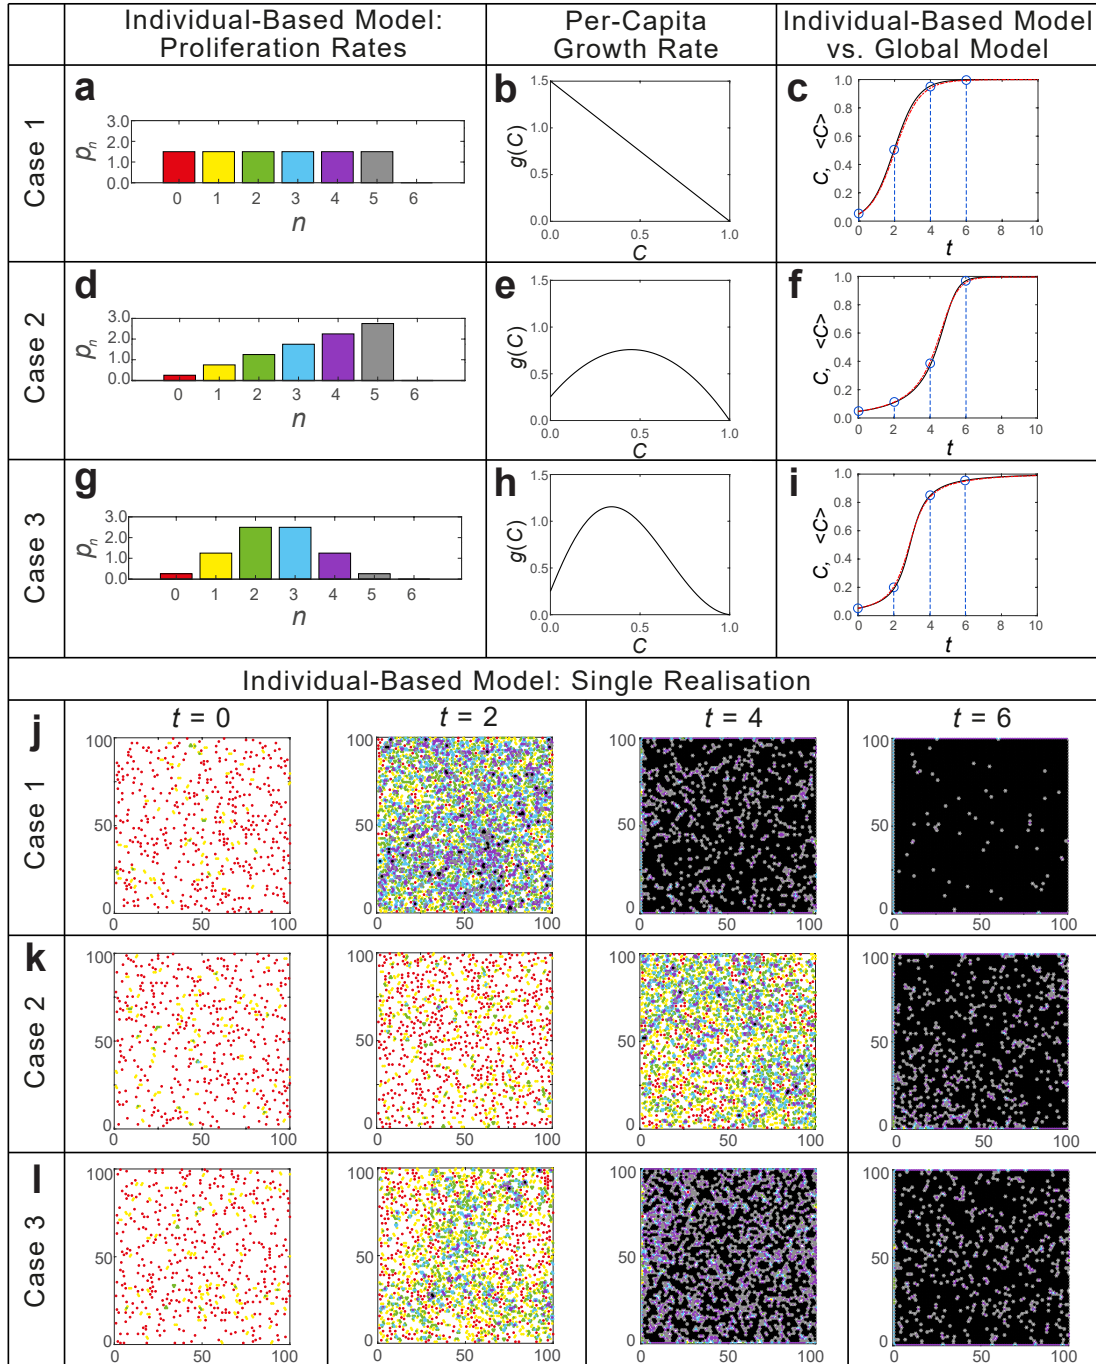

Figure 3: **Comparison of data from the IBM with the solution of the corresponding global population description for different suites of proliferation rates.** Simulations of the IBM are shown with three different families of proliferation rates  $p_n$  (a,d,g), described in equation (8), along with the resulting per-capita rate of the global population model (b,e,h), described in equation (9). The three different families of proliferation rates are referred to as Case 1 (a–c,j), Case 2 (d–f,k), and Case 3 (g–i,l), respectively. (c,f,i) The solution of the global population description,  $C$ , is compared with averaged density data obtained by performing 100 identically-prepared realisations of the IBM to give  $\langle C \rangle$ , where the initial agent density is  $C(0) = 0.05$ . (j–l) Single realisations of the IBM, with the same colour scheme as in Fig. 2, are shown at  $t = 0, 2, 4$ , and  $6$ , corresponding to the blue circles on the  $\langle C \rangle$  curves. For each realisation of the IBM, we use a  $100 \times 115$  hexagonal lattice, corresponding to the two-dimensional domain  $[1, 100] \times [1, 100]$ . Here,  $m = 100 \max(p_n)$ .



that the average agent density from the simulated IBM data is faithfully captured by the global population description. With these results, we now turn to the inverse problem to determine which individual-level rates describe global Allee effects.

## Choosing IBM rates to match Allee effect models: the inverse problem

A standard practice for the application of an Allee-type model involves matching population-level experimental data to a particular continuum model, without any regard for the underlying individual-level mechanisms. Therefore, it is natural to ask, for a *given* per-capita growth rate,  $f(C)$ , how do we choose the IBM parameters so that the per-capita growth rate determined from the continuum limit of the IBM,  $g(C)$  in equation (6), is identically  $f(C)$ ?

Mathematically, we seek the parameters  $\gamma_n$  in equation (6) such that  $g(C) \equiv f(C)$ . To do this, we first note that equation (6) is linear in  $\gamma_n$ . Therefore, we can evaluate equation (6) at seven distinct points  $C_i \in \{C_0, C_1, \dots, C_6\}$  and obtain a corresponding linear system in  $\gamma_n$ . By denoting

$$g(C_i) = \sum_{j=0}^6 M_{ij} \gamma_j, \quad (10)$$

we obtain the linear system

$$\mathbb{M} \boldsymbol{\gamma} = \mathbf{f}, \quad (11)$$

where the  $7 \times 7$  matrix  $\mathbb{M}$  has entries  $[M_{ij}]$ ,  $\boldsymbol{\gamma}$  is the vector of parameter values  $[\gamma_j]$ , and  $\mathbf{f}$  is the vector of function values  $[f(C_i)]$ . We note that the polynomials appearing in (6),  $C^n(1-C)^{6-n}$ , are linearly independent, so  $\mathbb{M}$  is never singular and the solution of this system is  $\boldsymbol{\gamma} = \mathbb{M}^{-1} \mathbf{f}$ . Furthermore, if  $f(C)$  is a polynomial of degree 6 or less and  $\mathbf{f} \neq \mathbf{0}$ , this unique solution of  $\boldsymbol{\gamma}$  provides the IBM parameters such that  $g(C) \equiv f(C)$ . We discuss a method of determining the IBM parameters for other forms of  $f(C)$  in the Supplementary Information.

To prevent populations from becoming infinite, we require that  $f(C)$  will be non-positive when  $C = 1$ , so we impose  $f(1) \leq 0$ . Noting that  $g(1) = -\gamma_6 = -p_6 \alpha_6 \leq 0$ , this implies that  $\gamma_6 = -f(1) \geq 0$ , which is consistent with the restriction that  $p_6, \alpha_6 \geq 0$ . Common per-capita rates and the corresponding IBM parameters are tabulated in the Supplementary Information.

Upon determining suitable parameters  $\gamma_n$  that match a specific  $f(C)$ , we then consider choosing  $p_n$  and  $\alpha_n$  from equation (7). One straightforward combination of parameters is

$$(p_n, \alpha_n) = \begin{cases} (\gamma_n, 0), & \gamma_n \geq 0, \quad n < 6, \\ \left( \frac{(n-6)\gamma_n}{n}, 1 \right), & \gamma_n < 0, \quad n > 0, \\ \left( R, 1 - \frac{\gamma_0}{R} \right), & \gamma_0 < 0, \quad n = 0, \\ (\gamma_6, 1), & \gamma_6 > 0, \quad n = 6, \\ (0, 0), & \gamma_6 = 0. \end{cases} \quad (12)$$

Here,  $R = \max_{1 \leq n \leq 6} p_n$  and only appears in the case when  $f(0) < 0$ . This choice of  $R$  provides a balance between minimising the relative death rate  $\alpha_0 > 1$  while preventing  $p_0$  from dominating other proliferation rates. Furthermore, having  $\gamma_6 > 0$  only occurs when  $f(1) < 0$ , implying that the death rate  $d_6 = p_6 \alpha_6$ , shown in

black in Fig. 2, must be strictly positive.

### Comparing the IBM with global population models

With this systematic method of determining the IBM proliferation and death rates that match various choices of  $f(C)$ , we compare the average agent density determined by the IBM,  $\langle C \rangle$ , with its corresponding global population description,  $C$ . Results in Fig. 4 show that the IBM agent density agrees very well with the global population description, provided that the initial agent density,  $C(0)$ , is sufficiently far away from any unstable equilibria of the global population description. An unstable equilibrium is a particular density  $C^*$  such that  $dC/dt$  at this density,  $C^*f(C^*)$ , is zero, but agent densities near  $C^*$  diverge *away* from the equilibrium. For example, logistic growth (Fig. 4a) has an unstable equilibrium at  $C^* = 0$ , whereas the Strong Allee effect (Fig. 4c) has an unstable equilibrium for a positive  $C^*$  (Fig. 4c has  $C^* = 0.4$ ).

IBM simulations where the density is close to an unstable equilibrium are dominated by stochastic noise<sup>11;13;27</sup>; therefore, we do not expect that  $\langle C \rangle$  will agree with  $C$  in these cases. Indeed, this disagreement is clear in Fig. 4 with initial conditions in the Strong Allee effect and Hyper-Allee effect close to their unstable equilibria (see Fig. 4 caption for the explicit forms of these per-capita rates). Nevertheless, the IBM sufficiently captures the salient features of a large class of Allee-type dynamics with a suitable choice of proliferation rates, death rates, and initial conditions.

### Mechanistic interpretation of experimental data

Per-capita growth rates describing population growth and extinction can match the global trends in experimental data<sup>3-8</sup>, but fail to provide any insight at the individual-level scale. In contrast, the mathematical tools presented in this work provide the missing link that connects individual-level mechanisms to various global per-capita rates, via solving equation (11). Therefore, we can provide insight into individual-level behaviour from experimental data with the following approach. First, we choose a per-capita growth rate to match the global features of the experimental data. Second, the associated global model parameters are then fit to the data: for example, by minimising the least-square error between the global population description and the experimental data. Last, we solve the inverse problem and determine the associated IBM parameters that give rise to the experimentally-observed global behaviour.

To highlight the insight possible from this approach, we consider two population-level data sets and provide previously hidden detail about individual-level behaviour<sup>6;7</sup>. In Johnson et al.<sup>6</sup>, BT-474 breast cancer cells are seeded at three initial densities in a 96-well plate, and cell proliferation is observed for 328 hours. Model selection analysis in Johnson et al.<sup>6</sup> suggests that an Allee effect is required to describe this data. As there is no evidence of population extinction, we consider the Weak Allee effect with per-capita rate

$$f(C) = r \left( \frac{C}{A} + 1 \right) \left( 1 - \frac{C}{K} \right), \quad A > 0, \quad \text{and} \quad K > 0, \quad (13)$$

where  $r$  is the per-capita growth rate at  $C = 0$ . We match this model to three experimental datasets simultaneously by minimising the *combined* least-squares error of all datasets. This approach is different to the method presented in Johnson et al.<sup>6</sup>, where each dataset is fit separately to the authors' proposed per-capita rate. As observed in Fig. 5, this Weak Allee effect model agrees with all three experimental datasets simultaneously. Since the global parameters of the Weak Allee Effect do not vary between the three experimental datasets, we determine the underlying individual-level mechanisms using equation (11). In Fig. 5b, we show that the IBM proliferation rates associated with this Weak Allee effect increase linearly with

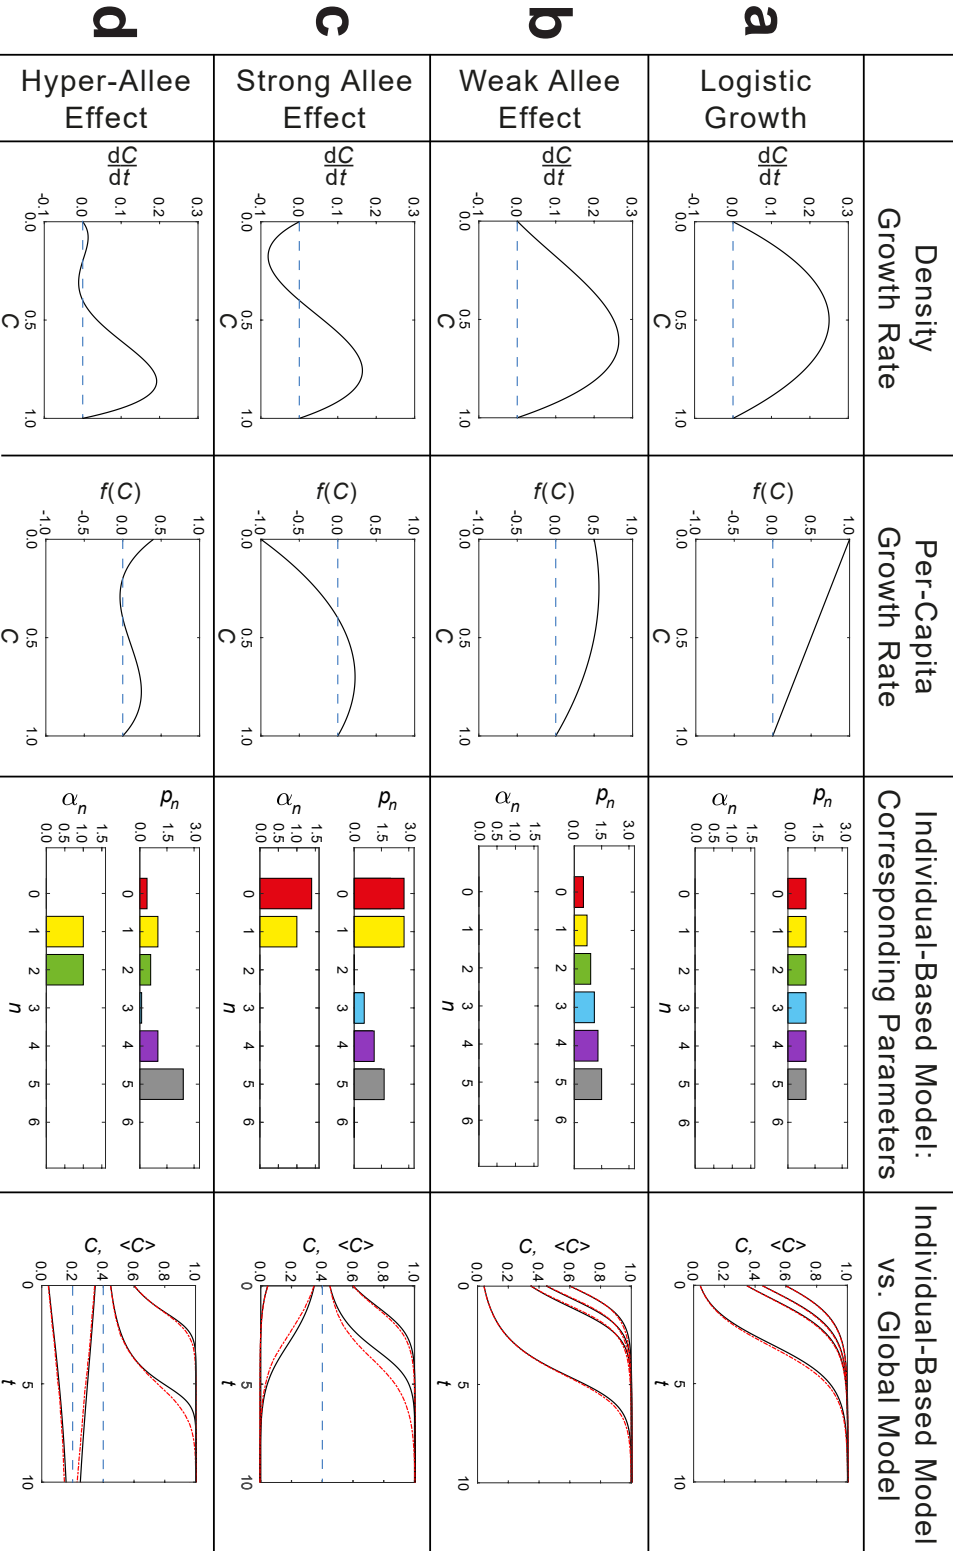

Figure 4: **Summary of IBM mechanisms that correspond to particular choices of global per-capita growth rates.** Four different choices of global density growth rates, along with their corresponding per-capita growth rates,  $f(C)$ , are shown. (a) Logistic growth has  $f(C) = 1 - C$ ; (b) the Weak Allee effect has  $f(C) = (C + 0.5)(1 - C)$ ; (c) the Strong Allee effect has  $f(C) = 2.5(C - 0.4)(1 - C)$ ; and; (d) the Hyper-Allee effect has  $f(C) = 5(C - 0.2)(C - 0.4)(1 - C)$ . The corresponding IBM parameters are determined by solving equations (11) and (12) to determine the proliferation rates  $p_n$  and relative death rates  $\alpha_n$ . The solution of the global population description,  $C$ , is compared with averaged density data obtained by performing 100 identically-prepared realisations of the IBM to give  $\langle C \rangle$ , where four different initial agent densities are considered:  $C(0) = 0.05, 0.35, 0.45$ , and  $0.6$ . For each realisation of the IBM, we use a  $100 \times 115$  hexagonal lattice while  $m = 100 \max(p_n)$ .

local density, as we observed when discussing the forward problem (Fig. 3). This is to be expected, since the Weak Allee effect also features a reduced growth rate at low densities. Furthermore, the individual-level rates increase by a factor of about three, which is significantly different to simpler models such as the logistic growth model, where the proliferation rates are independent of local density (see Fig. 4). We conclude that the experimental observations presented in Johnson et al.<sup>6</sup> can be explained by allowing the attempted proliferation rates of BT-474 breast cancer cells to linearly increase as a function of local density. Without posing and solving the inverse problem described here, this individual-level insight is not possible.

To compare continuum descriptions with experimental results that arise in ecology, we consider the datasets in Melica et al.<sup>7</sup>, where the dynamics of the population density of *Aurilia aurita* polyps growing on oyster shells is measured. Melica et al.<sup>7</sup> observe that a series of experiments where polyps are initially distributed at low density leads the population density evolve to some particular carrying capacity. Interestingly, when the same experiments are performed at a much higher initial density, the population decays to a different, higher, carrying capacity. This observation is explained in Melica et al.<sup>7</sup> by supposing the population dynamics are logistic, with the requirement that there are two different carrying capacities, despite the fact that the classic logistic model specifies a single carrying capacity only. Instead, we consider the “Hyper-Allee effect” model, Fig. 4(d), with per-capita rate

$$f(C) = r \left( \frac{C}{A} - 1 \right) \left( \frac{C}{B} - 1 \right) \left( 1 - \frac{C}{K} \right), \quad 0 < A < B < K. \quad (14)$$

Equation (14) has the advantage that two stable equilibria,  $A$  and  $K$ , exist. We fit this model to two experimental datasets simultaneously by minimising the combined least-squares error of both datasets. As seen in Fig. 6, the Hyper-Allee effect model agrees with both experimental datasets with only a change in the initial condition.

To provide further insight about the population dynamics of this experiment, we determine the corresponding IBM parameters that give rise to this Hyper-Allee effect. We note that if  $f(C)$  is rescaled such that the largest recorded density point, the high-density initial condition, corresponds to  $C = 1$  (Supplementary Information), then we must have  $f(1) < 0$ . Equation (11) implies that  $\gamma_6 > 0$ , producing non-zero attempted proliferation and death rates when an individual has  $n = 6$  nearest neighbours, shown in black bars in Fig. 6 b,c. However, the presence of death rates at various local densities (Fig. 6c) drives low density populations to the smaller carrying capacity  $A$ , while high density populations are driven to the larger carrying capacity  $K$ . We conclude that the experimental observations in Melica et al.<sup>7</sup>, displaying the co-existence of two stable population densities, can be explained by varying the death rates with local density.

In both examples, there is a clear need to use global population models more nuanced than logistic growth to capture the experimentally-observed features. The resulting Allee effect models are able to explain a variety of experimental data without requiring the global model parameters to be a function of the initial condition.

## Discussion

Allee effects were first proposed to describe observed behaviour of populations that exhibit features unable to be explained by classical models, such as exponential and logistic growth. Such classical models rely on heavily simplifying assumptions, including all population densities being able to survive, and the growth and death rates being independent of the local density. The Allee effect relaxes these assumptions and modifies

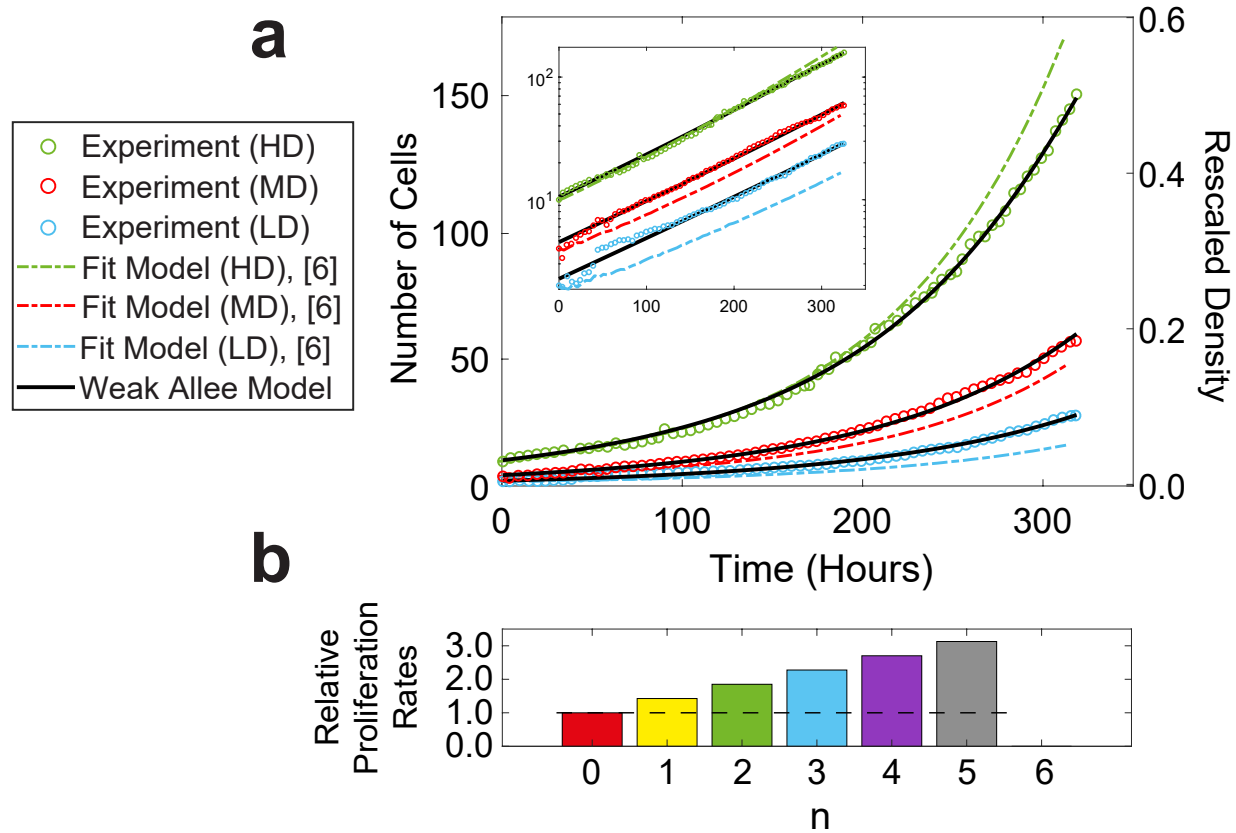

Figure 5: **Number of BT-474 breast cancer cells compared to model predictions shown in Johnson et al.<sup>6</sup> and the Weak Allee effect.** The number of BT-474 breast cancer cells are shown at low density initial conditions (LD), shown in blue circles, medium density initial conditions (MD), shown in red circles, and high density initial conditions (HD), shown in green circles, over the span of 328 hours<sup>6</sup>. A semi-log plot of the data is shown in the inset of the figure to better distinguish the experimental data at low cell numbers. The three datasets can be fit to a modified Allee effect separately (dot-dash lines; parameters and model description shown in Johnson et al.<sup>6</sup>). The Weak Allee effect (solid curves) is fit to minimise the combined least-square error of all experimental datasets shown in Johnson et al.<sup>6</sup>. The Weak Allee parameters are determined to be  $A = 148$ ,  $K = 315$ , and  $r = 0.00757$ , with fit initial conditions  $c_1 = 2.27$ ,  $c_2 = 4.51$ , and  $c_3 = 10.6$ . This parameter set yields the total least-squares error, combined over all three datasets, of 230, compared to the total least-squares error of 10900 using the model described in Johnson et al.<sup>6</sup>. The rescaled density is the cell number data divided by the carrying capacity,  $K$ . Using this rescaled per-capita rate, we obtain the corresponding IBM parameters (b,c) by using equations (11) and (12). The proliferation rates (b) are shown relative to  $p_0$ , shown in red, which has been rescaled by  $r$  so that  $p_0 = 1$ . Unlike the logistic growth model (black dashed line), whose proliferation rates are independent of the local density  $n$ , the Weak Allee effect corresponds to proliferation rates that linearly increase with  $n$ . The magnitudes of the death rates are all zero.

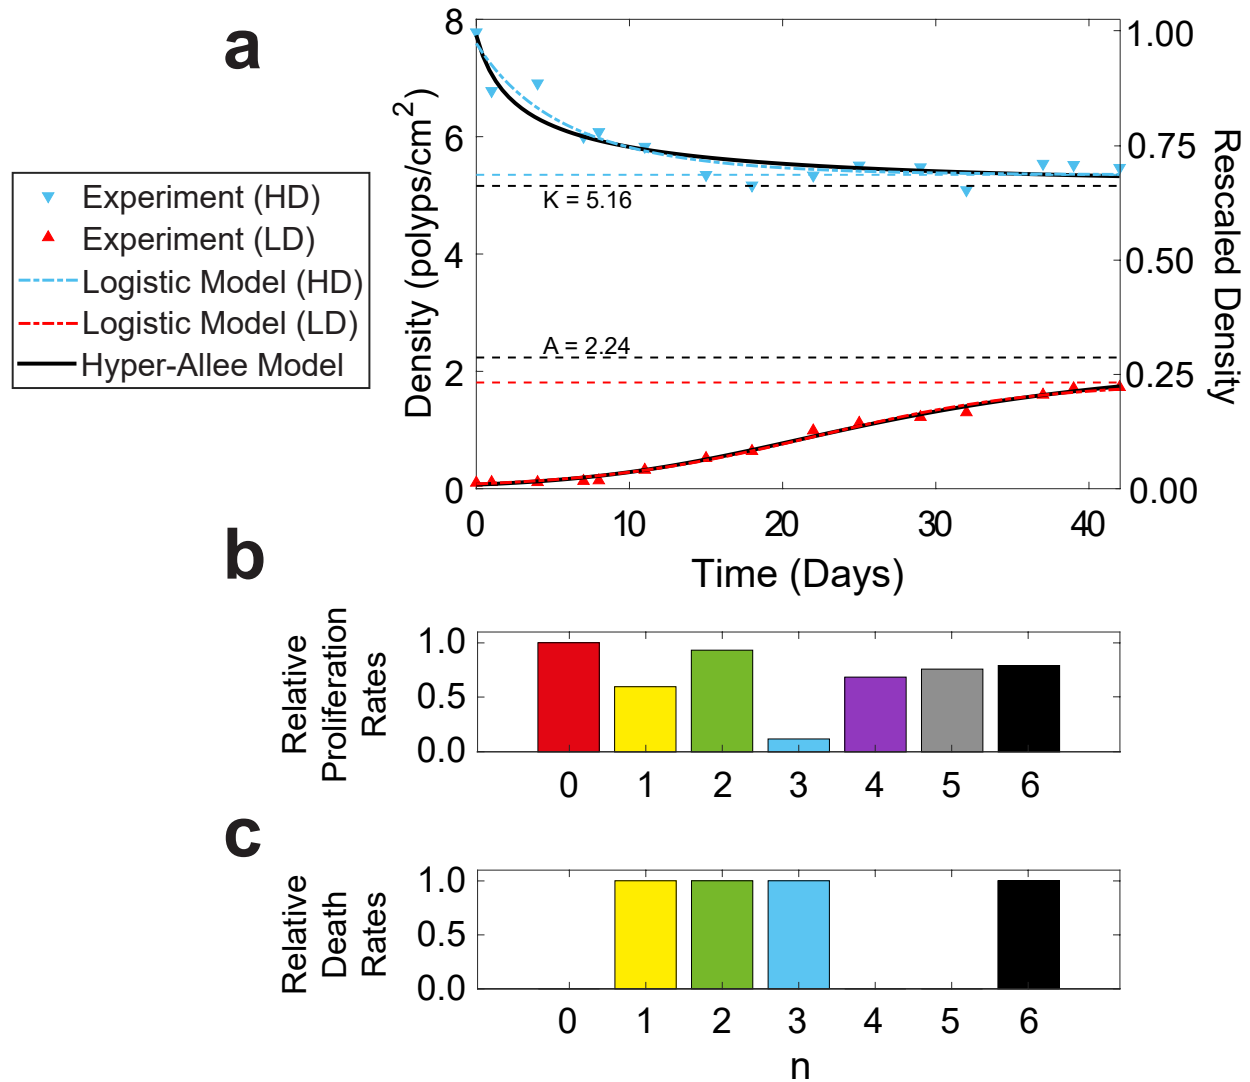

Figure 6: **Density of *Aurlia aurita* polyps compared to model predictions of logistic growth and the Hyper-Allee effect.** (a) The density of polyps are shown in low density treatments (LD), shown in red triangles, and high density treatments (HD), shown in blue triangles, over the span of 42 days. The two datasets can be fit to logistic growth separately (red and blue dot-dash lines; parameters are listed in Melica et al.<sup>7</sup>), but cannot match both datasets simultaneously. The Hyper-Allee effect (equation (14), solid curves) is fit to minimise the combined least-square error of both experimental datasets shown in Melica et al.<sup>7</sup>. The Hyper-Allee parameters are determined to be  $A = 2.24$ ,  $B = 4.69$ ,  $K = 5.16$ , and  $r = 0.161$ , with two fit initial conditions  $c_1 = 0.0691$  and  $c_2 = 7.73$ . The stable carrying capacities of both models are shown with dashed lines in the colours that correspond to their respective model. The rescaled density is the density data divided by the maximal experimentally observed polyp density,  $c_2$ . Using this rescaled per-capita rate, we obtain the corresponding IBM parameters (b,c) by using equations (11) and (12). The attempted proliferation rates (b) are shown relative to  $p_0$ , shown in red, which has been rescaled by  $r$  so that  $p_0 = 1$ . The magnitudes of the death rates (c) are shown relative to their corresponding proliferation rates in (b). Since the rescaled density  $C = 1$  is not an equilibrium point, the attempted proliferation and death rates when  $n = 6$  (black bars) are non-zero.

the logistic model by reducing the per-capita growth rate of a population to small or negative values at low densities, resulting in the potential extinction of a population below some critical density threshold. However, examination of Allee effects are nearly always performed at a global population scale alone. As such, unpacking the underlying, individual-level mechanisms that give rise to global Allee effect models, has remained an open question in biology and ecology.

We demonstrate that by permitting proliferation and death rates in the IBM to vary with local density, we retrieve a large family of global population per-capita growth rates, including Allee effects. Furthermore, we propose a systematic method to determine individual-level mechanisms in the IBM that agree with a given particular per-capita growth rate model, such as might arise from experimental data. For example, once a per-capita growth rate is chosen to match the global features of experimental data, we can solve an associated linear system to determine the IBM parameters that give rise to the experimentally-observed global behaviour. This method demonstrates that commonly used global per-capita growth rates, such as logistic growth, the Strong Allee effect, and the Weak Allee effect, can all be recovered with this IBM.

In this work, we also present strategies to connect experimental data to various global population models, which can in turn be linked to individual-level mechanisms. Specifically, we examine two experimental datasets arising in cell biology and ecology<sup>6;7</sup>. In both cases, an Allee effect describes these datasets, and the global model parameters are not sensitive to initial conditions as suggested previously. Consequently, the IBM associated with these Allee effects not only provides better understanding of individual-level behaviour, but also provides insight into the limitations of commonly used per-capita rates. This IBM is useful for both theorists and experimentalists when analysing population dynamics; the modelling framework is simple to use and interpret, yet the insight and implications of the framework are broad and widely applicable.

By shifting to a modelling paradigm that involves the combination of an individual-based framework and its corresponding population dynamics, we provide unprecedented insight into the behaviour of individuals from observed global behaviour. This insight provides a solid justification for the inclusion of more complex individual-level mechanisms to describe the salient features of population behaviour. The modelling approach proposed here provides a framework capable of unifying common global population descriptions with more complex population descriptions. Indeed, our results are not in conflict with the most common global population descriptions, including logistic growth and various forms of the Allee effect. Instead, our work highlights that by building a model from the individual-scale up, we systematically recover the basic underlying mechanisms that provide insight into whether a population will survive or become extinct.

## **Code availability**

All MATLAB codes used to generate results are available at [https://github.com/nfadai/Fadai\\_Allee2019](https://github.com/nfadai/Fadai_Allee2019).

## **Data availability**

All data used in the present research are available upon request from the authors.

## **Acknowledgements**

This work is supported by the Australian Research Council (DP170100474). N.T.F. thanks Alex Browning (QUT) for help on creating the MATLAB applets. M.J.S. is also supported by the University of Canterbury Erskine Fellowship.

## **Authors' contributions**

N.T.F. created the algorithm code and MATLAB applets, produced all figures, and carried out the analysis of the results; M.J.S. and S.T.J. conceived, designed, supervised, and coordinated the study and helped draft the figures. N.T.F. wrote the paper, on which all other authors commented and made revisions. All authors gave final approval for publication.

## **Competing interests**

We have no competing interests.



## References

- [1] Murray J.D. *Mathematical Biology I: An Introduction*. Springer-Verlag; 2003.
- [2] Edelstein-Keshet L. *Mathematical Models in Biology*. SIAM; 2005.
- [3] West G.B., Brown J.H., Enquist B.J. A general model for ontogenetic growth. *Nature*. 2001;413(6856):628–631.
- [4] Sarapata E.A., de Pillis L.G. A comparison and catalog of intrinsic tumor growth models. *Bulletin of Mathematical Biology*. 2014;76(8):2010–2024.
- [5] Tsoularis A., Wallace J. Analysis of logistic growth models. *Mathematical Biosciences*. 2002;179(1):21–55.
- [6] Johnson K.E., Howard G., Mo W., Strasser M.K., Lima E.A., Huang S., et al. Cancer cell population growth kinetics at low densities deviate from the exponential growth model and suggest an Allee effect. *PLoS Biology*. 2019;17(8):e3000399.
- [7] Melica V., Invernizzi S., Caristi G. Logistic density-dependent growth of an *Aurelia aurita* polyps population. *Ecological Modelling*. 2014;291:1–5.
- [8] Gerlee P. The model muddle: in search of tumor growth laws. *Cancer Research*. 2013;73(8):2407–2411.
- [9] Neufeld Z., von Witt W., Lakatos D., Wang J., Hegedus B., Czirok A. The role of Allee effect in modelling post resection recurrence of glioblastoma. *PLoS Computational Biology*. 2017;13(11):e1005818.
- [10] Stephens P.A., Sutherland W.J., Freckleton R.P. What is the Allee effect? *Oikos*. 1999;87(1): 185–190.
- [11] Taylor C.M., Hastings A. Allee effects in biological invasions. *Ecology Letters*. 2005;8:895–908.
- [12] Johnston S.T., Baker R.E., McElwain D.L.S., Simpson M.J. Co-operation, competition and crowding: a discrete framework linking Allee kinetics, nonlinear diffusion, shocks and sharp-fronted travelling waves. *Scientific Reports*. 2017;7:42134.
- [13] Dennis B. Allee effects in stochastic populations. *Oikos*. 2002;96(3):389–401.
- [14] Maini P.K., McElwain D.L.S., Leavesley D.I. Traveling wave model to interpret a wound-healing cell migration assay for human peritoneal mesothelial cells. *Tissue Engineering*. 2004;10(3–4):475–482.
- [15] Lewis M.A., Kareiva P. Allee dynamics and the spread of invading organisms. *Theoretical Population Biology*. 1993;43(2):141–158.
- [16] Roose T., Chapman S.J., Maini P.K. Mathematical models of avascular tumor growth. *SIAM Review*. 2007;49(2):179–208.
- [17] Scott J.G., Basanta D., Anderson A.R., Gerlee P. A mathematical model of tumour self-seeding reveals secondary metastatic deposits as drivers of primary tumour growth. *Journal of The Royal Society Interface*. 2013;10:20130011.
- [18] Courchamp F., Clutton-Brock T., Grenfell B. Inverse density dependence and the Allee effect. *Trends in Ecology & Evolution*. 1999;14(10):405–410.

- [19] Allee W.C., Bowen E.S. Studies in animal aggregations: mass protection against colloidal silver among goldfishes. *Journal of Experimental Zoology*. 1932;61(2):185–207.
- [20] Tu C., Suweis S., D’Odorico P. Impact of globalization on the resilience and sustainability of natural resources. *Nature Sustainability*. 2019;2:283–289.
- [21] Johnson D.M., Liebhold A.M., Tobin P.C., Bjørnstad O.N. Allee effects and pulsed invasion by the gypsy moth. *Nature*. 2006;444(7117):361–363.
- [22] Hara T., Kimura M., Kikuzawa K. Growth patterns of tree height and stem diameter in populations of *Abies veitchii*, *A. mariesii* and *Betula ermanii*. *The Journal of Ecology*. 1991;79(4):1085–1098.
- [23] Ito H., Kakishima S., Uehara T., Morita S., Koyama T., Sota T., et al. Evolution of periodicity in periodical cicadas. *Scientific Reports*. 2015;5:14094.
- [24] Larcombe M.J., Jordan G.J., Bryant D., Higgins S.I. The dimensionality of niche space allows bounded and unbounded processes to jointly influence diversification. *Nature Communications*. 2018;9:4258.
- [25] Simberloff D., Martin J.L., Genovesi P., Maris V., Wardle D.A., Aronson J., et al. Impacts of biological invasions: what’s what and the way forward. *Trends in Ecology & Evolution*. 2013;28(1):58–66.
- [26] Seebens H., Blackburn T.M., Dyer E.E., Genovesi P., Hulme P.E., Jeschke J.M., et al. No saturation in the accumulation of alien species worldwide. *Nature Communications*. 2017;8:14435.
- [27] Drake J.M. Allee effects and the risk of biological invasion. *Risk Analysis: An International Journal*. 2004;24(4):795–802.
- [28] Keitt T.H., Lewis M.A., Holt R.D. Allee effects, invasion pinning, and species borders. *The American Naturalist*. 2001;157(2):203–216.
- [29] Korolev K.S., Xavier J.B., Gore J. Turning ecology and evolution against cancer. *Nature Reviews Cancer*. 2014;14(5):371–380.
- [30] Böttger K., Hatzikirou H., Voss-Böhme A., Cavalcanti-Adam E.A., Herrero M.A., Deutsch A. An emerging Allee effect is critical for tumor initiation and persistence. *PLoS Computational Biology*. 2015;11(9):e1004366.
- [31] Axelrod R., Axelrod D.E., Pienta K.J. Evolution of cooperation among tumor cells. *Proceedings of the National Academy of Sciences*. 2006;103(36):13474–13479.
- [32] Lolas G., Bianchi A., Syrigos K.N. Tumour-induced neurogenesis and perineural tumour growth: a mathematical approach. *Scientific Reports*. 2016;6:20684.
- [33] Baker R.E., Simpson M.J. Correcting mean-field approximations for birth-death-movement processes. *Physical Review E*. 2010;82(4):041905.
- [34] Fahse L., Wissel C., Grimm V. Reconciling classical and individual-based approaches in theoretical population ecology: a protocol for extracting population parameters from individual-based models. *The American Naturalist*. 1998;152(6):838–852.
- [35] Browning A.P., McCue S.W., Simpson M.J. A Bayesian computational approach to explore the optimal duration of a cell proliferation assay. *Bulletin of Mathematical Biology*. 2017;79(8):1888–1906.

- [36] Jin W., Penington C.J., McCue S.W., Simpson M.J. Stochastic simulation tools and continuum models for describing two-dimensional collective cell spreading with universal growth functions. *Physical Biology*. 2016;13(5):056003.
- [37] Boukal D.S., Berec L. Single-species models of the Allee effect: extinction boundaries, sex ratios and mate encounters. *Journal of Theoretical Biology*. 2002;218(3):375–394.
- [38] Tobin P.C., Bjørnstad O.N. Spatial dynamics and cross-correlation in a transient predator–prey system. *Journal of Animal Ecology*. 2003;72(3):460–467.
- [39] Jin W., Shah E.T., Penington C.J., McCue S.W., Chopin L.K., Simpson M.J.. Reproducibility of scratch assays is affected by the initial degree of confluence: experiments, modelling and model selection. *Journal of Theoretical Biology*. 2016;390:136–145.
- [40] Johnston S.T., Simpson M.J., McElwain D.L.S. How much information can be obtained from tracking the position of the leading edge in a scratch assay? *Journal of the Royal Society Interface*. 2014;11:20140325.
- [41] Johnston S.T., Shah E.T., Chopin L.K., McElwain D.L.S., Simpson M.J. Estimating cell diffusivity and cell proliferation rate by interpreting IncuCyte ZOOM<sup>TM</sup> assay data using the Fisher-Kolmogorov model. *BMC Systems Biology*. 2015;9:38.
- [42] Gillespie, D.T. Exact stochastic simulation of coupled chemical reactions. *The Journal of Physical Chemistry*. 1977;81(25):2340–2361.
